# Supplementary material
Source: Springer Nature journal article supplement (https://www.springermedizin.de/resource/supplementary/13017_2012_256_MOESM2_ESM.pdf/9635792)

Relative renal  
function on the  
injured side  
(DMSA)

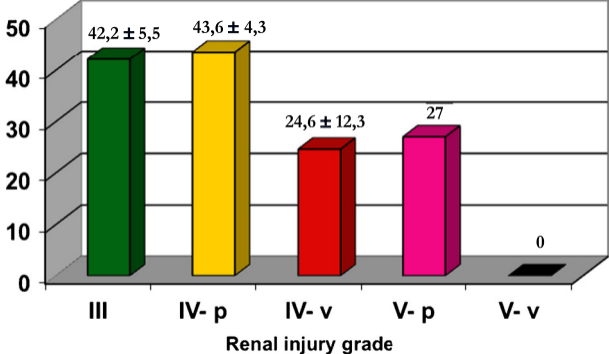

Supplement: MOESM2 [file 9635792]
